# Supplementary material for: Implementation of a Hub-and-Spoke Partnership for Opioid Use Disorder Treatment in a Medicaid Nonexpansion State
Source: Atypon-hosted journal article supplement (doi:10.1176/appi.ps.202100343), 2021-12-08
Supplement: appi.ps.202100343.ds001.pdf [file appi.ps.202100343.ds001.pdf]

Table: Hub organizations in Tennessee in First 2-year State Opioid Response (SOR) funding cycle:

| Organization                                        | City         | Region              | Type                                                                                       | American Society of Addiction Medicine (ASAM) Levels of Care and medication for opioid use disorder (MOUD) provided | Spokes (#) | Spokes (specific names)                                                                                                                                                                    |
|-----------------------------------------------------|--------------|---------------------|--------------------------------------------------------------------------------------------|---------------------------------------------------------------------------------------------------------------------|------------|--------------------------------------------------------------------------------------------------------------------------------------------------------------------------------------------|
| Vanderbilt University Medical Center                | Nashville    | Middle Tennessee    | Academic Medical Center                                                                    | ASAM: Outpatient 1.0; IOP 2.1; Inpatient 3.7<br><br>MOUD: buprenorphine-naloxone (BN), IM Naltrexone (XR-NTX).      | 6          | Buffalo Valley, Mending Hearts, Samaritan Recovery Community, Matthew Walker, Meharry Medical College Dept of Psychiatry, and Behavioral Health Group (BHG)                                |
| McNabb Center                                       | Knoxville    | East Tennessee      | Private, non-profit providing behavioral health services                                   | ASAM: Outpatient 1.0; IOP 2.1; Inpatient 3.2D and 3.5<br><br>MOUD: BN, XR-NTX                                       | 7          | Cherokee Health, McNabb Center-Chattanooga, Susannah’s House, Volunteer Behavioral Health Care, QRO Wellness (Onrise), Council for Alcohol & Drug Abuse Services (CADAS), BHG Knoxville    |
| East TN Healthcare Holdings (“Overmountain Health”) | Johnson City | Northeast Tennessee | Private, non-profit Opioid Treatment Program (OTP) partnering with non-profit BH providers | ASAM: Outpatient 1.0<br><br>MOUD: BN, XR-NTX, methadone                                                             | 5          | Appalachian Counseling, Comprehensive community services, Frontier Health, Families Free, Red Legacy Recovery<br>Kingsport Family Recovery was a spoke for a short period of time in SOR I |

|                                                   |         |                     |                                                          |                                                                           |   |                                                                                                                |
|---------------------------------------------------|---------|---------------------|----------------------------------------------------------|---------------------------------------------------------------------------|---|----------------------------------------------------------------------------------------------------------------|
| Cocaine and Alcohol Awareness Program (CAAP Inc.) | Memphis | Southwest Tennessee | Private, non-profit providing behavioral health services | ASAM: Outpatient 1.0, IOP 2.1, Inpatient 3.2D and 3.5<br>MOUD: BN, XR-NTX | 4 | Downtown Memphis Ministries (First Step), BHG Memphis, Innovative counseling and consulting, Serenity Recovery |
|---------------------------------------------------|---------|---------------------|----------------------------------------------------------|---------------------------------------------------------------------------|---|----------------------------------------------------------------------------------------------------------------|
